# Supplementary material for: The Content of Psychiatric Advance Directives: A Systematic Review
Source: Atypon-hosted journal article supplement (doi:10.1176/appi.ps.202200002), 2022-08-30
Supplement: appi.ps.202200002.ds001.pdf [file appi.ps.202200002.ds001.pdf]

**PRISMA flow diagram of included studies.**

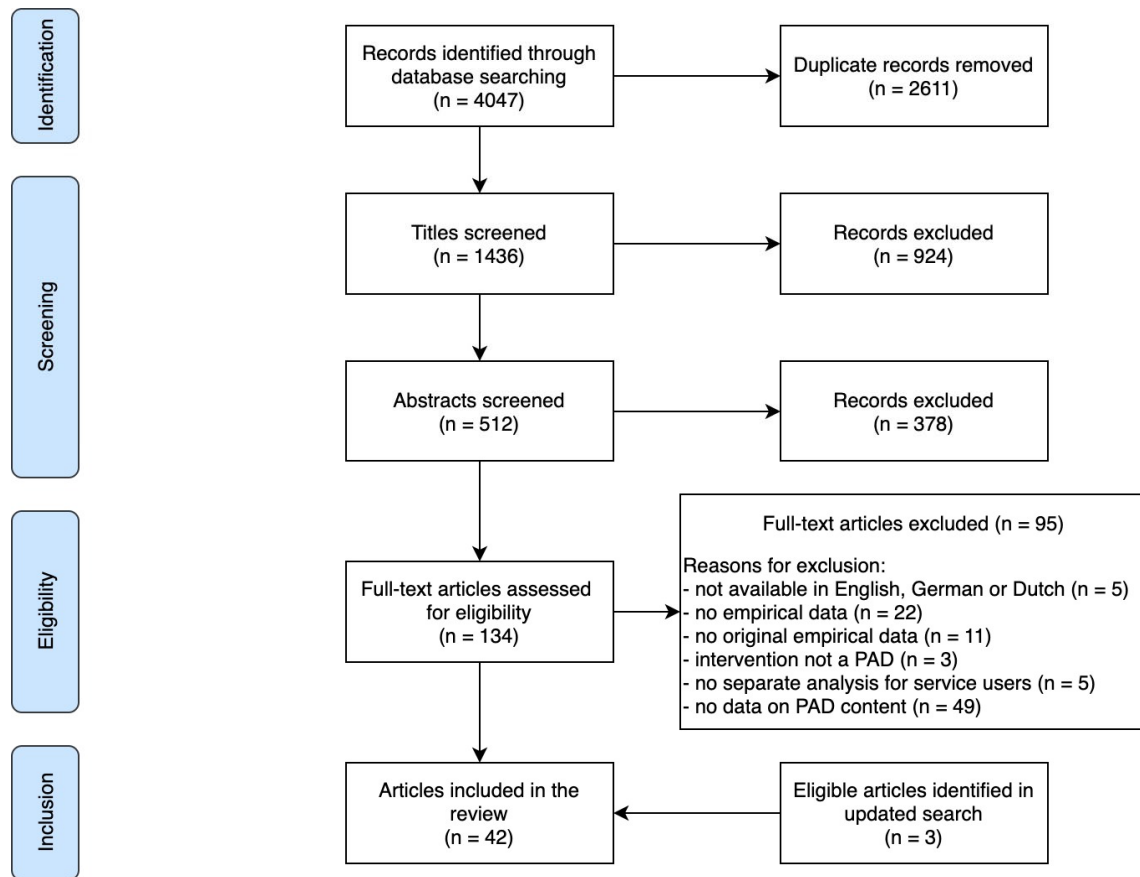

**PubMed Search String.**

The following search strategy was used for PubMed:

("advance directive\*[Title/Abstract] OR "advance agreement\*[Title/Abstract] OR "advance care plan\*[Title/Abstract] OR "advance decision\*[Title/Abstract] OR "advance statement\*[Title/Abstract] OR "psychiatric will\*[Title/Abstract] OR "Ulysses contract\*[Title/Abstract] OR "Ulysses agreement\*[Title/Abstract] OR "Mill's Will\*[Title/Abstract] OR "voluntary commitment contract\*[Title/Abstract] OR "nexum contract\*[Title/Abstract] OR "crisis plan\*[Title/Abstract] OR "self-binding"[Title/Abstract]) AND ("mental disorder\*[Title/Abstract] OR "mental health"[Title/Abstract] OR "mental illness"[Title/Abstract] OR "psychiatr\*[Title/Abstract])

**Table of article characteristics.**

| Study No. | Reference                | Country                | Methods                              | Participating service users (n where available)                                                                                                                                                                  | Type of study (h/d)* | PAD inclusion criterion to study?             | Type of PAD                                      | Quality Rating           |
|-----------|--------------------------|------------------------|--------------------------------------|------------------------------------------------------------------------------------------------------------------------------------------------------------------------------------------------------------------|----------------------|-----------------------------------------------|--------------------------------------------------|--------------------------|
| 1         | Ambrosini et al. (2011a) | Canada (Quebec)        | Qualitative interviews               | Total n=12<br>Schizophrenia n=5<br>Bipolar n=3<br>Depression n=4                                                                                                                                                 | d                    | No, but PAD creation part of study            | Facilitated by lawyer                            | QUAL 5                   |
| 2         | Ambrosini et al. (2011b) | Canada (Quebec)        | Mixed methods                        | Adults with serious mental illness<br><br>Quantitative: Total n=59<br>Schizophrenia n=19<br>Bipolar n=16<br>Depression n=24<br><br>Qualitative: Total n=12<br>Schizophrenia n=5<br>Bipolar n=3<br>Depression n=4 | d                    | No, but PAD creation part of study            | 90 % non-facilitated, 10 % facilitated by lawyer | QUAL 4<br>QUAN 5<br>MM 5 |
| 3         | Amering et al. (2005)    | USA (New York (state)) | Qualitative interviews, focus groups | Adults with extensive experience with mental health services and crisis interventions, including hospitalisation<br>Total n=33                                                                                   | d                    | No, but PAD created in the context of study   | Non-facilitated                                  | QUAL 5                   |
| 4         | Atkinson et al. (2003)   | UK (Scotland)          | Qualitative interviews, focus groups | Total n=6                                                                                                                                                                                                        | h                    | No                                            | Not specified                                    | QUAL 3                   |
| 5         | Backlar et al. (2001)    | USA (Oregon)           | Qualitative interviews               | Severe and persistent mental disorders<br>Total n=40<br>Schizophrenia n=28<br>Other n=12                                                                                                                         | d                    | No, but PAD creation offered as part of study | Facilitated by researcher                        | QUAL 2,5                 |

|    |                                    |                      |                               |                                                                                                                                                                                                           |   |                                           |                                                                |                                |
|----|------------------------------------|----------------------|-------------------------------|-----------------------------------------------------------------------------------------------------------------------------------------------------------------------------------------------------------|---|-------------------------------------------|----------------------------------------------------------------|--------------------------------|
| 6  | Borschmann et al. (2014)           | UK (England)         | Qualitative document analysis | Adults with Borderline Personality Disorder<br>Total n=41                                                                                                                                                 | d | Yes, but PAD creation part of prior study | Joint Crisis Plan                                              | QUAL 5                         |
| 7  | Buscemi (2003)                     | USA (Missouri)       | Quantitative survey           | Adults with mental illness, mostly diagnosis of bipolar, depression and schizophrenia<br>Total n=137                                                                                                      | h | No                                        | Not specified                                                  | QUAN 2                         |
| 8  | Drack-Schoenenberger et al. (2016) | Switzerland          | Qualitative document analysis | Total n=108<br>Schizophrenia n=23<br>Affective disorders n=29<br>Substance abuse disorders n=20<br>Neurotic, stress-related, somatoform disorders n=17<br>Personality disorders n=19                      | d | No, but PAD creation part of study        | Crisis card facilitated by researcher                          | QUAL 5                         |
| 9  | Elbogen et al. (2007)              | USA (North Carolina) | Mixed methods                 | Total n=125<br>Schizophrenia or schizoaffective disorder n=76<br>Bipolar or Major depression n=49                                                                                                         | d | No, but PAD creation part of study        | Facilitated by researcher                                      | QUAL 4,5<br>QUAN 4,5<br>MM 1,5 |
| 10 | Farrelly et al. (2014)             | UK (England)         | Qualitative document analysis | Adults with psychotic disorder, psychiatric admission within the last 2 years, currently in contact with community health team<br>Total n=221<br>Schizophrenia spectrum n=164<br>Affective psychosis n=57 | d | No, but PAD creation part of study        | Joint Crisis Plan with treatment team and external facilitator | QUAL 5                         |
| 11 | Foy et al. (2007)                  | UK (Scotland)        | Qualitative survey            | Adults with severe and enduring mental illness<br>Total n=58                                                                                                                                              | h | No                                        | Not specified                                                  | QUAL 2                         |
| 12 | Gowda et al. (2018)                | India                | Quantitative survey           | Total n=182<br>Schizophrenia n=86<br>Affective disorders n=80<br>Other n=16                                                                                                                               | h | No, but PAD creation part of study        | Not specified                                                  | QUAN 4                         |
| 13 | Graetz et al. (2012)               | Germany              | Mixed methods                 | Total n=36<br>Schizophrenia n=8                                                                                                                                                                           | d | Yes                                       | Joint Crisis Plan                                              | QUAL 2<br>QUAN 3,5             |

|    |                           |                      |                                |                                                                                                                         |         |                                    |                                                                |                            |
|----|---------------------------|----------------------|--------------------------------|-------------------------------------------------------------------------------------------------------------------------|---------|------------------------------------|----------------------------------------------------------------|----------------------------|
|    |                           |                      |                                | Schizoaffective disorder n=17<br>Affective disorder n=8<br>Neurotic or anxiety disorder n=2<br>Personality disorder n=6 |         |                                    |                                                                | MM 1,5                     |
| 14 | Henderson et al. (2017)   | UK (England)         | Quantitative document analysis | Adults with psychotic disorder, psychiatric admission within the last 2 years<br>Total n=99                             | d       | No, but PAD creation part of study | Joint Crisis Plan with treatment team and external facilitator | QUAN 5                     |
| 15 | Hindley et al. (2019)     | UK                   | Quantitative survey            | Bipolar<br>Total n=932                                                                                                  | d and h | No                                 | Facilitated                                                    | QUAN 4                     |
| 16 | Hiu et al. (2020)         | Singapore            | Qualitative interviews         | Psychotic related disorders<br>Total n=28                                                                               | h       | No                                 | Not specified                                                  | QUAL 5                     |
| 17 | Khazaal et al. (2008)     | Switzerland          | Qualitative document analysis  | Total n=20<br>Bipolar n=17<br>Schizoaffective disorder n=3                                                              | d       | No, but PAD creation part of study | PAD with CBT intervention in the creation process              | QUAL 3                     |
| 18 | Kim et al. (2007)         | USA (North Carolina) | Qualitative interviews         | Severe mental illness<br>Total n=28                                                                                     | d       | No, but PAD creation part of study | Facilitated by researcher                                      | QUAL 5                     |
| 19 | Kumar et al. (2013)       | India                | Qualitative document analysis  | Schizophrenia or schizoaffective disorder<br>Total n=122                                                                | d       | No, but PAD creation part of study | Non-facilitated                                                | QUAL 2                     |
| 20 | Lenagh-Glue et al. (2018) | New Zealand          | Quantitative survey            | Total n=23                                                                                                              | h       | No                                 | Not specified                                                  | QUAN 3                     |
| 21 | Lenagh-Glue et al. (2020) | New Zealand          | Qualitative document analysis  | Total n=53                                                                                                              | d       | No, but PAD creation part of study | Created by service user alone, but witnessed                   | QUAL 5                     |
| 22 | Lequin et al. (2021)      | Switzerland          | Mixed methods                  | Documents (quan. and qual.):<br>Total n=184<br>Substance use disorder n=83<br>Psychosis n=66                            | d       | Yes                                | Joint Crisis Plan                                              | QUAL 5<br>QUAN 3<br>MM 2,5 |

|    |                            |                        |                                |                                                                                                                         |   |                                    |                                                                     |                              |
|----|----------------------------|------------------------|--------------------------------|-------------------------------------------------------------------------------------------------------------------------|---|------------------------------------|---------------------------------------------------------------------|------------------------------|
|    |                            |                        |                                | Mood disorder n=28<br>Other n=7                                                                                         |   |                                    |                                                                     |                              |
|    |                            |                        |                                | Interviews (qual. and quan.):<br>Total n=12<br>Mood disorders n=4<br>Psychosis n=3<br>Other n=4                         |   |                                    |                                                                     |                              |
| 23 | Morriss et al. (2020)      | UK (England and Wales) | Mixed methods                  | Bipolar<br>Quantitative survey: Total n=544<br>Qualitative interviews: Total n=18                                       | d | Yes                                | Non-facilitated                                                     | QUAL 5<br>QUAN 3,5<br>MM 2,5 |
| 24 | Morrissey (2015)           | Ireland                | Mixed methods                  | Total n=111                                                                                                             | h | No                                 | Not specified                                                       | QUAL 3<br>QUAN 4,5<br>MM 4,5 |
| 25 | O'Connell et al. (2005)    | USA (Ohio)             | Mixed methods                  | Total n=32                                                                                                              | h | No                                 | Not specified                                                       | QUAL 4,5<br>QUAN 3<br>MM 2   |
| 26 | Page et al. (2002)         | UK (England)           | Quantitative document analysis | Anorexia Nervosa<br>Total n=41                                                                                          | d | Yes                                | Crisis Card, facilitated by nurse or social worker                  | QUAN 3                       |
| 27 | Papageorgiou et al. (2004) | UK (England)           | Quantitative document analysis | In-patients due to discharge from involuntary treatment<br>Documents:<br>Total n=79<br><br>Questionnaire:<br>Total n=59 | d | No, but PAD creation part of study | Mostly created by service user alone, partly assisted by researcher | QUAN 5                       |
| 28 | Pathare et al. (2015)      | India                  | Quantitative document analysis | Severe or chronic mental illness<br>Total n=75                                                                          | d | No, but PAD creation part of study | Facilitated by health worker                                        | QUAN 5                       |

|    |                             |                        |                                                |                                                                                                                                                                                   |   |                                               |                                                   |                              |
|----|-----------------------------|------------------------|------------------------------------------------|-----------------------------------------------------------------------------------------------------------------------------------------------------------------------------------|---|-----------------------------------------------|---------------------------------------------------|------------------------------|
| 29 | Penzenstadler et al. (2019) | Switzerland            | Qualitative document analysis                  | Addiction disorders<br>Total n=49<br>Alcohol n=27<br>Polysubstance n=13<br>Cannabis n=3<br>Cocaine n=3<br>Heroin n=2<br>Benzodiazepine n=1                                        | d | No, but PAD creation part of study            | Facilitated by case managers                      | QUAL 5                       |
| 30 | Reilly et al. (2010)        | UK (Scotland)          | Qualitative document analysis                  | Total n=55                                                                                                                                                                        | d | Yes                                           | Not specified                                     | QUAL 3,5                     |
| 31 | Scheyett et al. (2012)      | USA (South Carolina)   | Mixed methods                                  | Students with severe mental illness<br>Total n=40                                                                                                                                 | h | No                                            | Not specified                                     | QUAL 5<br>QUAN 3<br>MM 3     |
| 32 | Srebnik et al. (2005)       | USA (Washington state) | Quantitative and qualitative document analysis | Psychiatric outpatients with at least two major psychiatric crises within the last two years<br>Total n=106<br>Schizophrenia n=47<br>Bipolar n=28<br>Depression n=23<br>Other n=8 | d | No, but PAD creation part of study            | Facilitated by software                           | QUAL 3,5<br>QUAN 4<br>MM 2,5 |
| 33 | Stephenson et al. (2020)    | UK                     | Qualitative focus groups                       | Bipolar<br>Total n=10                                                                                                                                                             | h | No, but PAD creation part of study            | Prototype PAD template developed (similar to JCP) | QUAL 5                       |
| 34 | Sutherby et al. (1999)      | UK (England)           | Mixed methods                                  | Psychotic and bipolar disorder<br>Total n=40                                                                                                                                      | d | No, but PAD creation offered as part of study | (Joint) Crisis Plan, facilitated by researcher    | QUAL 2,5<br>QUAN 4<br>MM 2   |
| 35 | Swanson et al. (2003)       | USA (North Carolina)   | Quantitative survey                            | Schizophrenia and related disorders<br>Total n=104                                                                                                                                | h | No                                            | Not specified                                     | QUAN 2                       |

|    |                         |                      |                                               |                                                                                                                                  |   |                                    |                           |          |
|----|-------------------------|----------------------|-----------------------------------------------|----------------------------------------------------------------------------------------------------------------------------------|---|------------------------------------|---------------------------|----------|
| 36 | Swanson et al. (2006)   | USA (North Carolina) | RCT                                           | Schizophrenia, schizoaffective disorder, other psychotic disorder, or major mood disorder with psychotic features<br>Total n=239 | d | No, but PAD creation part of study | Facilitated by researcher | QUAN 3,5 |
| 37 | Tekkalaki et al. (2018) | India                | Quantitative survey                           | Total n=50<br>Schizophrenia n=30<br>Bipolar n=20                                                                                 | h | No                                 | Not specified             | QUAN 3,5 |
| 38 | Thom et al. (2019)      | New Zealand          | Qualitative focus groups                      | Total n=25                                                                                                                       | h | No                                 | Not specified             | QUAL 5   |
| 39 | Thom et al. (2015)      | New Zealand          | Quantitative survey                           | Total n=110                                                                                                                      | h | No                                 | Not specified             | QUAN 3,5 |
| 40 | Valentine et al. (2021) | Australia            | Qualitative interviews                        | First episode psychosis (young people)<br>Total n=12                                                                             | h | No                                 | Not specified             | QUAL 5   |
| 41 | Varekamp (2004)         | Netherlands          | Qualitative interviews                        | Total n=18<br>Schizophrenia n=6<br>Bipolar n=11<br>Borderline personality disorder n=1                                           | h | Partly (1/3 of participants)       | Ulysses Directives        | QUAL 5   |
| 42 | Wilder et al. (2010)    | USA (North Carolina) | Quantitative interviews and document analysis | Total n=123<br>Schizophrenia/schizoaffective disorder n=77<br>Bipolar n=31<br>Depression with psychotic features n=15            | d | No, but PAD creation part of study | Facilitated               | QUAN 4,5 |

\*d = descriptive, contains data of the content of service users' PADs; h = hypothetical, contains data about service users' responses to questions about what should be included in PADs.



## References

1. Ambrosini DL, Bemme D, Crocker AG, et al.: Narratives of individuals concerning psychiatric advance directives: qualitative study. *J Ethics Ment Health* 2011a; 6:1-9
2. Ambrosini DL, Crocker AG, Latimer E: Preferences for instructional or proxy advance directives in mental health: an exploratory mixed methods study. *J Ethics Ment Health* 2011b; 6:1-19
3. Amering M, Stastny P, Hopper K: Psychiatric advance directives: qualitative study of informed deliberations by mental health service users. *The British journal of psychiatry : the journal of mental science* 2005; 186:247-252
4. Atkinson JM, Garner HC, Stuart S, et al.: The development of potential models of advance directives in mental health care. *J Ment Health* 2003; 12:575-584
5. Backlar P, McFarland BH, Swanson JW, et al.: Consumer, provider, and informal caregiver opinions on psychiatric advance directives. *Admin Policy Ment Health* 2001; 28:427-441
6. Borschmann R, Trevillion K, Henderson RC, et al.: Advance statements for borderline personality disorder: a qualitative study of future crisis treatment preferences. *Psychiatr Serv* 2014; 65:802-807
7. Buscemi BAH: The theory of planned behavior and the health belief model applied to mental health consumers' attitudes toward advance directives applying to psychiatric care. ProQuest Information & Learning, 2003
8. Drack-Schoenenberger T, Bleiker M, Lengler S, et al.: Crisis cards for the prevention of compulsory hospitalization signs of a crisis, treatment-specific demands and coping strategies from the patients' perspective. *Psychiatr Prax* 2016; 43:253-259
9. Elbogen EB, Swanson JW, Swartz MS, et al.: Effectively implementing psychiatric advance directives to promote self-determination of treatment among people with mental illness. *Psychol Public Policy Law* 2007; 13:273-288
10. Farrelly S, Brown G, Rose D, et al.: What service users with psychotic disorders want in a mental health crisis or relapse: thematic analysis of joint crisis plans. *Soc Psychiatry Psychiatr Epidemiol* 2014; 49:1609-1617
11. Foy J, MacRae A, Thorn A, et al.: Advance statements: Survey of patients' views and understanding. *Psychiatric Bulletin* 2007; 31:339-341
12. Gowda GS, Noorthoorn EO, Lepping P, et al.: Factors influencing advance directives among psychiatric inpatients in India. *Int J Law Psychiatry* 2018; 56:17-26
13. Graetz J, Brieger P: Implementation of joint-crisis plans - a study of health care users and professionals. [German]. *Psychiatr Prax* 2012; 39:388-393
14. Henderson C, Farrelly S, Flach C, et al.: Informed, advance refusals of treatment by people with severe mental illness in a randomised controlled trial of joint crisis plans: demand, content and correlates. *BMC Psychiatry* 2017; 17, 376
15. Hindley G, Stephenson LA, Ruck Keene A, et al.: "Why have I not been told about this?": a survey of experiences of and attitudes to advance decision-making amongst people with bipolar. *Wellcome Open Res* 2019; 4:16
16. Hiu S, Su A, Ong S, et al.: Stakeholder perspective on barrier to the implementation of Advance Care Planning in a traditionally paternalistic healthcare system. *PLoS One* 2020; 15:0242085
17. Khazaal Y, Richard C, Matthieu-Darekar S, et al.: Advance directives in bipolar disorder, a cognitive behavioural conceptualization. *Int J Law Psychiatry* 2008; 31:1-8

18. Kim MM, Van Dorn RA, Scheyett AM, et al.: Understanding the personal and clinical utility of psychiatric advance directives: a qualitative perspective. *Psychiatry* 2007; 70:19-29
19. Kumar TC, John S, Gopal S, et al.: Psychiatric advance statements: an Indian experience. *Int J Soc Psychiatry* 2013; 59:531-534
20. Lenagh-Glue J, O'Brien A, Dawson J, et al.: A MAP to mental health: the process of creating a collaborative advance preferences instrument. *New Zealand Med J* 2018; 131:18-26
21. Lenagh-Glue J, Thom K, O'Brien A, et al.: The content of Mental Health Advance Preference statements (MAPs): an assessment of completed advance directives in one New Zealand health board. *Int J Law Psychiatry* 2020; 68:101537
22. Lequin P, Ferrari P, Suter C, et al.: The joint crisis plan: a powerful tool to promote mental health. *Front Psychiatry* 2021; 12:621436
23. Morriss R, Mudigonda M, Bartlett P, et al.: National survey and analysis of barriers to the utilisation of the 2005 mental capacity act by people with bipolar disorder in England and Wales. *J Ment Health* 2020; 29:131-138
24. Morrissey FE: The introduction of a legal framework for advance directives in the UN CRPD era: the views of Irish service users and consultant psychiatrists. *Ethics Med Public Health* 2015; 1:325-338
25. O'Connell MJ, Stein CH: Psychiatric advance directives: perspectives of community stakeholders. *Admin Policy Ment Health* 2005; 32:241-265
26. Page LA, Sutherby K, Treasure JL: A preliminary description of the use of 'relapse management cards' in anorexia nervosa. *Eur Eat Disord Rev* 2002; 10:281-291
27. Papageorgiou A, Janmohamed A, King M, et al.: Advance directives for patients compulsorily admitted to hospital with serious mental disorders: directive content and feedback from patients and professionals. *J Ment Health* 2004; 13:379-388
28. Pathare S, Shields L, Nardodkar R, et al.: What do service users want? A content analysis of what users may write in psychiatric advance directives in India. *Asian J Psychiatr* 2015; 14:52-56
29. Penzenstadler L, Soares C, Machado A, et al.: Advance statements to prevent treatment disengagement in substance use disorders. *Can J Addict* 2019; 10:10-18
30. Reilly J, Atkinson JM: The content of mental health advance directives: advance statements in Scotland. *Int J Law Psychiatry* 2010; 33:116-121
31. Scheyett AM, Rooks A: University students' views on the utility of psychiatric advance directives. *J Am Coll Health* 2012; 60:90-93
32. Srebnik DS, Rutherford LT, Peto T, et al.: The content and clinical utility of psychiatric advance directives. *Psychiatr Serv* 2005; 56:592-598
33. Stephenson LA, Gergel T, Ruck Keene A, et al.: The PACT advance decision-making template: preparing for Mental Health Act reforms with co-production, focus groups and consultation. *Int J Law Psychiatry* 2020; 71:101563
34. Sutherby K, Szmukler GI, Halpern A, et al.: A study of 'crisis cards' in a community psychiatric service. *Acta psychiatr Scand* 1999; 100:56-61
35. Swanson JW, Swartz MS, Hannon MJ, et al.: Psychiatric advance directives: a survey of persons with schizophrenia, family members, and treatment providers. *Int J Forensic Ment Health* 2003; 2:73-86
36. Swanson JW, Swartz M, Elbogen E, et al.: Facilitated psychiatric advance directives: a randomized trial of an intervention to foster advance treatment planning among persons with severe mental illness. *The American Journal of Psychiatry* 2006; 163:1943-1951
37. Tekkalaki B, Patil VY, Patil S, et al.: How do our patients respond to the concept of psychiatric advance directives? An exploratory study from India. *Indian J Psychol Med* 2018; 40:305-309

38. Thom K, Lenagh-Glue J, O'Brien AJ, et al.: Service user, whānau and peer support workers' perceptions of advance directives for mental health. *Int J Ment Health Nurs* 2019; 28:1296-1305
39. Thom K, O'Brien AJ, Tellez JJ: Service user and clinical perspectives of psychiatric advance directives in New Zealand. *Int J Ment Health Nurs* 2015; 24:554-560
40. Valentine L, Grace D, Pryor I, et al.: "When I'm thinking straight, I can put things in place for when I'm not." Exploring the use of advance statements in first-episode psychosis treatment: young people, clinician, and carer perspectives. *Community Ment Health J* 2021; 57:18-28
41. Varekamp I: Ulysses directives in The Netherlands: opinions of psychiatrists and clients. *Health Policy* 2004; 70:291-301
42. Wilder CM, Elbogen EB, Moser LL, et al.: Medication preferences and adherence among individuals with severe mental illness and psychiatric advance directives. *Psychiatr Serv* 2010; 61:380-385
